# Supplementary material
Source: PubMed Central journal article supplement (PMC3811554)
Supplement: AEM.02900-13_zam999104870so1.pdf [file AEM.02900-13_zam999104870so1.pdf]

1 **Isolation of butanol- and isobutanol-tolerant bacteria and physiological characterization**  
2 **of their butanol tolerance**

3  
4  
5 **SUPPLEMENTAL MATERIAL**  
6

7 **Supplemental TABLE S1.** Primers used for the amplification, direct sequencing, and cloning  
8 of the *cfa* gene of strain CM4A.  
9

| Primer name                  | Use           | Primer sequence (5' to 3')      |
|------------------------------|---------------|---------------------------------|
| <i>cfa</i> -F <sup>a</sup>   | Amplification | GAGGGAATGCAATGTTAG              |
| <i>cfa</i> -R <sup>a</sup>   | Amplification | TCTATTAACCAATCCGG               |
| <i>cfa</i> 362R <sup>a</sup> | Sequencing    | CCTAGATCGTAATGGCTGTG            |
| <i>cfa</i> 871F <sup>a</sup> | Sequencing    | GGTGGCTATATTCCTGGTG             |
| <i>cfa</i> -5EF <sup>b</sup> | Cloning       | <u>CCGAATTC</u> GAAATGCAATGTTAG |
| <i>cfa</i> -5XR <sup>b</sup> | Cloning       | <u>CCCTCGAGATTAACCAATCCG</u>    |

10  
11 <sup>a</sup>The primers were designed from the *cfa* gene sequence in the *Enterococcus faecalis* V583  
12 genome (NC004668). <sup>b</sup>Primers containing *Eco*RI and *Xho*I sites, as underlined, were used to  
13 amplify the *cfa* gene for cloning into the pET-28b expression vector (Novagen) to produce an  
14 N-terminal His 6-tagged fusion protein.  
15

16  
17  
18  
19  
20  
21  
22  
23  
24

**Supplemental TABLE S2.** Cell surface hydrophobicity of strain CM4A grown with or without 2.0% butanol.

| CM4A cells        | BATH (%) <sup>a</sup> |                  |                       |             |             |
|-------------------|-----------------------|------------------|-----------------------|-------------|-------------|
|                   | Butanol               | <i>n</i> -Hexane | <i>n</i> -Tetradecane | Toluene     | Xylene      |
| without butanol   | 11.6 ± 2.94           | 22.3 ± 0.26      | 15.9 ± 0.45           | 30.5 ± 0.45 | 21.9 ± 1.58 |
| with 2.0% butanol | 0.8 ± 4.11            | 4.3 ± 1.62       | 6.5 ± 1.39            | 5.3 ± 1.39  | 2.6 ± 1.87  |

25  
26  
27  
28

<sup>a</sup>The value represents the percentage of cells adhering to a given solvent in three independent measurements.  $[1 - (\text{OD}_{600} \text{ of aqueous phase after mixing}) / (\text{OD}_{600} \text{ of initial suspension})] \times 100$ .

29  
30  
31  
32  
33

**Supplemental TABLE S3.** Changes in the membrane fatty acid compositions of the strain *E. coli*/pCFA and the control strain *E. coli*/pET28 in response to the presence of 0.1 mM IPTG<sup>a</sup>.

|                   | <i>E. coli</i> /pET28 | <i>E. coli</i> /pCFA |
|-------------------|-----------------------|----------------------|
| C12:0             | 4.1 ± 0.1             | 4.3 ± 0.3            |
| C14:0             | 8.8 ± 0.5             | 11.1 ± 0.1           |
| C14:0-3OH         | 3.4 ± 0.3             | 3.4 ± 1.4            |
| C14:1 $\omega$ 7c | ND                    | 0.1 ± 0.1            |
| C15:0             | 0.2 ± 0.0             | 0.1 ± 0.1            |
| C16:0             | 43.2 ± 0.2            | 45.2 ± 0.6           |
| C16:1 $\omega$ 7c | 16.3 ± 0.1            | 17.6 ± 0.6           |
| cyclo-C17:0       | 3.9 ± 0.1             | 5.6 ± 0.7            |
| C18:0             | 0.5 ± 0.1             | 0.2 ± 0.2            |
| C18:1 $\omega$ 7c | 19.4 ± 0.7            | 6.1 ± 0.6            |
| cyclo-C19:0       | 0.3 ± 0.0             | 6.5 ± 1.3            |

34  
35  
36  
37  
38  
39  
40  
41

<sup>a</sup>Each fatty acid composition is described as a percentage of the total fatty acids. The values are the means ± standard deviations of three independent measurements. Abbreviations: X:Y $\omega$ Zc, fatty acid containing X carbon atoms with Y double bonds at position Z, counted from the methyl terminus in the *cis* configuration; C14:0-3OH, 3-hydroxy tetradecanoic acid; cyclo-C17:0, *cis*-9,10-methylene hexadecanoic acid; cyclo-C19:0, *cis*-11,12-methylene octadecanoic acid; ND, not detected.

42

43

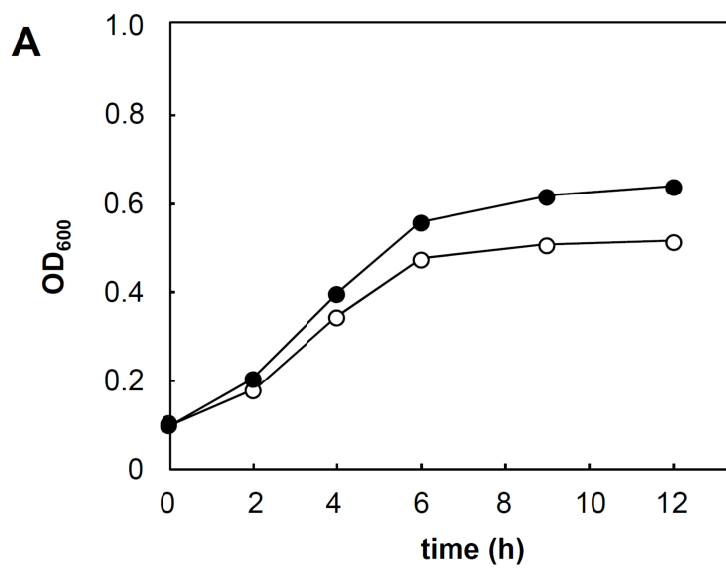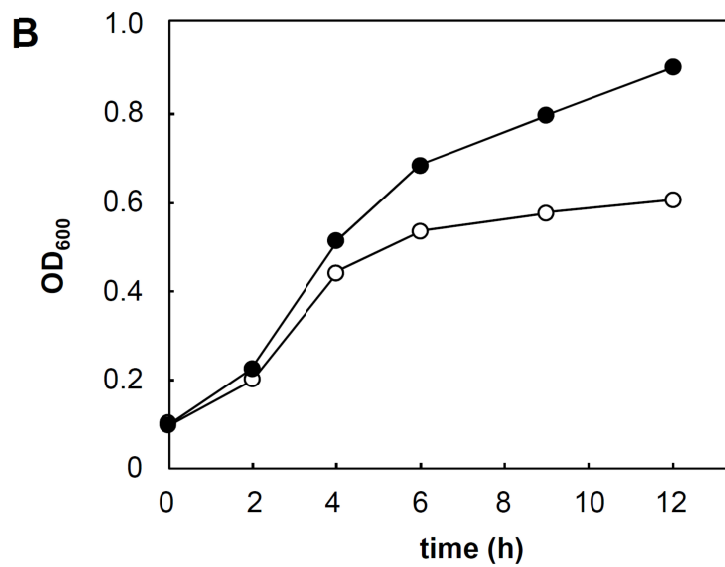

44

45

46 **Supplemental FIG. S1.** Growth of *E. coli/pCFA* (●) and the control strain *E. coli/pET28* (○)  
47 in the presence of 0.8% butanol (A) or 0.8% isobutanol (B). The values represent the mean of  
48 triplicate experiments.

49

50  
51  
52  
53

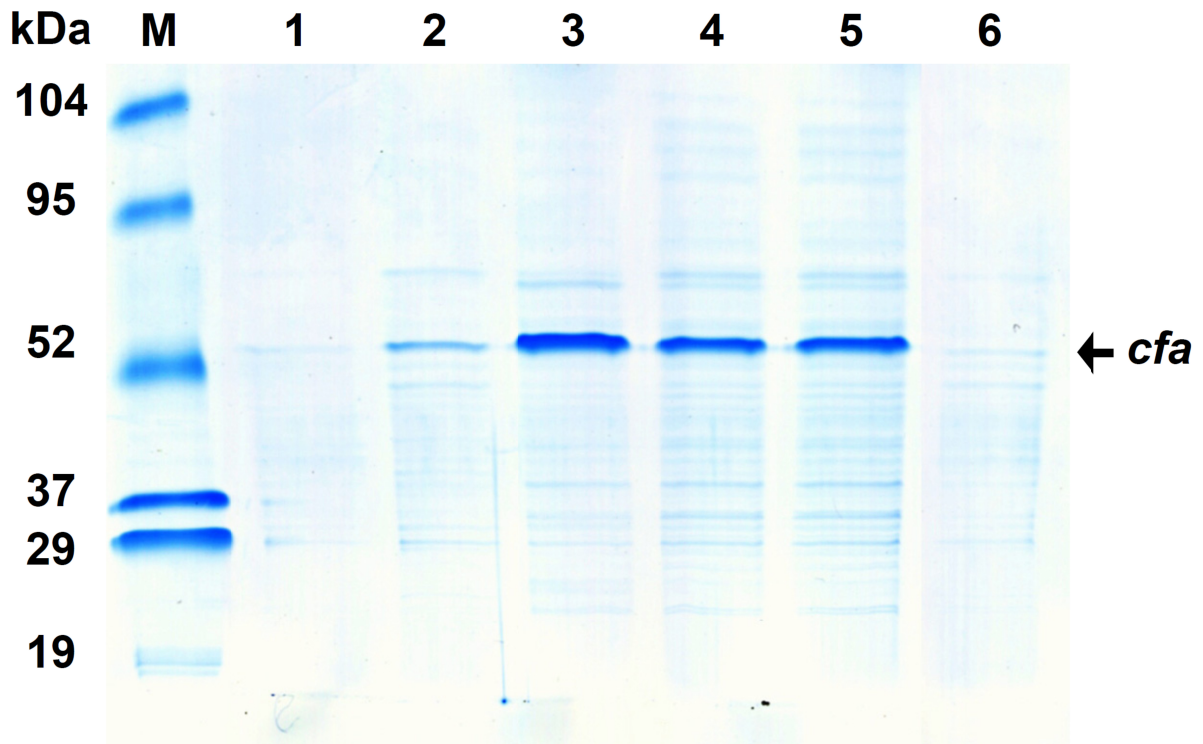

54  
55  
56  
57  
58  
59  
60  
61  
62

**Supplemental FIG. S2.** SDS-PAGE analysis of *cfa* gene expression in *E. coli*/pCFA (lane 1-5) and *E. coli*/pET28 (lane 6) at different concentration of IPTG. In total, 60  $\mu$ g of protein in the sonicated supernatant was purified by His-selective nickel affinity gel chromatography and analyzed by SDS-PAGE. Lane M, molecular weight marker; lane 1, 10 mM glucose without IPTG (negative control); lane 2, no IPTG; lane 3, 0.01 mM IPTG; lane 4, 0.1 mM IPTG; lane 5, 1.0 mM IPTG; lane 6, *E. coli*/pET28 grown without IPTG (negative control).

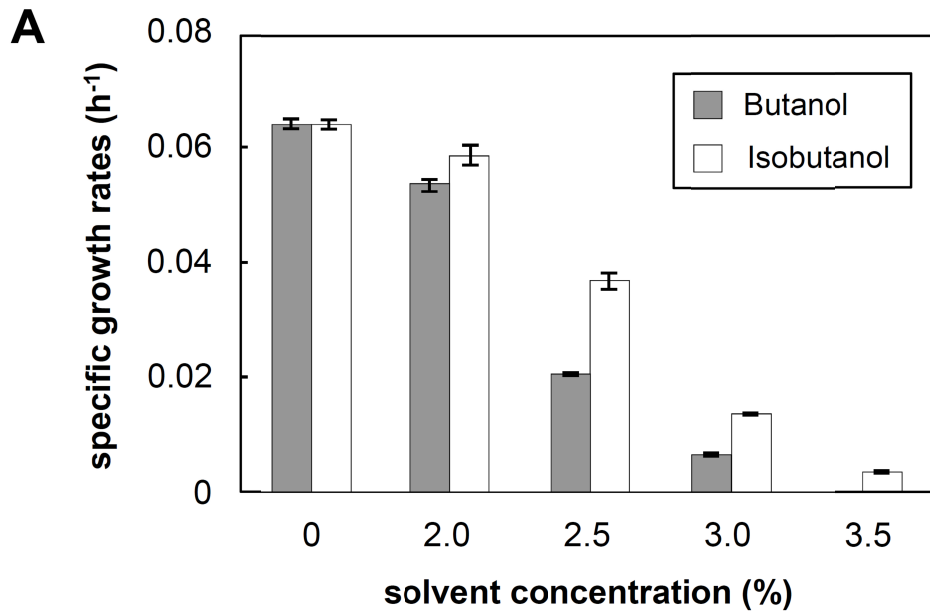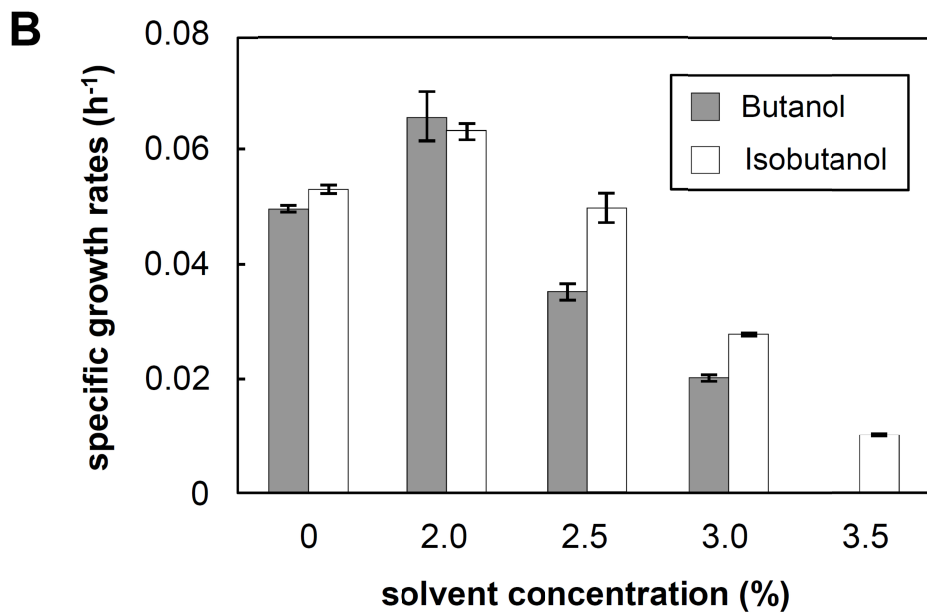

64

65

66 **Supplemental FIG. S3.** Butanol and isobutanol tolerance of strain GK12. The specific  
 67 growth rates of non-adapted (A) and butanol-adapted (B) cells following different butanol or  
 68 isobutanol challenges. Cell adaptation was previously achieved by 15 consecutive passages  
 69 with 2.0% butanol. The values and error bars represent the mean and SD of triplicate  
 70 experiments.

71
